1        **Scientific evaluation of negative exome sequencing followed by systematic scoring of**  
2        **candidate genes to decipher the genetics of neurodevelopmental disorders**

3

4 Benjamin Büttner,<sup>1</sup> Sonja Martin,<sup>1</sup> Anja Finck,<sup>1</sup> Maria Arelin,<sup>2</sup> Carolin Baade-Büttner,<sup>3</sup> Tobias  
5 Bartolomaeus,<sup>1</sup> Peter Bauer,<sup>4</sup> Astrid Bertsche,<sup>2</sup> Matthias K. Bernhard,<sup>2</sup> Saskia Biskup,<sup>5</sup> Nataliya Di  
6 Donato,<sup>6</sup> Magdeldin Elgizouli,<sup>7</sup> Roland Ewald,<sup>8</sup> Constanze Heine,<sup>1</sup> Yorck Hellenbroich,<sup>9</sup> Julia  
7 Hentschel,<sup>1</sup> Sabine Hoffjan,<sup>10</sup> Susanne Horn,<sup>1</sup> Frauke Hornemann,<sup>2</sup> Dagmar Huhle,<sup>11</sup> Susanne B.  
8 Kamphausen,<sup>12</sup> Wieland Kiess,<sup>2</sup> Ilona Krey,<sup>1</sup> Alma Kuechler,<sup>7</sup> Ben Liesfeld,<sup>8</sup> Andreas Merckenschlager,<sup>2</sup>  
9 Diana Mitter,<sup>1</sup> Petra Muschke,<sup>12</sup> Roland Pfäffle,<sup>2</sup> Tilman Polster,<sup>13</sup> Ina Schanze,<sup>12</sup> Jan-Ulrich Schlump,<sup>14</sup>  
10 Steffen Syrbe,<sup>15</sup> Dagmar Wieczorek,<sup>16</sup> Martin Zenker,<sup>12</sup> Johannes R. Lemke,<sup>1</sup> Diana Le Duc,<sup>1</sup> Konrad  
11 Platzer,<sup>1</sup> Rami Abou Jamra\*<sup>1</sup>

12

13 <sup>1</sup>Institute of Human Genetics, University of Leipzig Medical Center, Leipzig 04103, Germany

14 <sup>2</sup>Hospital for Children and Adolescents, University of Leipzig Medical Center, Leipzig 04103, Germany

15 <sup>3</sup>Department of Neurology, University of Leipzig Medical Center, Leipzig 04103, Germany

16 <sup>4</sup>Centogene AG, Rostock 18055, Germany

17 <sup>5</sup>CeGaT GmbH, Center for Genomics and Transcriptomics, Tübingen 72076, Germany

18 <sup>6</sup>Institute of Clinical Genetics, Technische Universität Dresden, Dresden 01307, Germany

19 <sup>7</sup>Institute of Human Genetics, University Hospital Essen, Essen 45122, Germany

20 <sup>8</sup>Limbus Medical Technologies GmbH, Rostock 18055, Germany

21 <sup>9</sup>Institute of Human Genetics, University Lübeck, Lübeck 23562, Germany

22 <sup>10</sup>Department of Human Genetics, Ruhr-University, Bochum 44801, Germany

23 <sup>11</sup>Praxis für Humangenetik Leipzig, Leipzig 04289, Germany

24 <sup>12</sup>Institute of Human Genetics, University Hospital Magdeburg, Magdeburg 39120, Germany

25 <sup>13</sup>Paediatric Epileptology, Mara Hospital gGmbH, Bethel Epilepsy Center, Bielefeld 33617, Germany

26 <sup>14</sup>Evangelical Hospital Oberhausen, Division for Children and Adolescents, Oberhausen 46047,

27 Germany

28 <sup>15</sup>Division for Neuropaediatrics and Metabolic Medicine, Center for Paediatric and Adolescent  
29 Medicine, Heidelberg University Hospital, Heidelberg 69120, Germany

30 <sup>16</sup>Institute of Human Genetics, Medical Faculty, Heinrich-Heine-University Düsseldorf, Düsseldorf  
31 40225, Germany

32 \*Corresponding author

33

34 **Electronic mail addresses**

35 Benjamin Büttner: Benjamin.Buettner@medizin.uni-leipzig.de

36 Sonja Martin: sonja.martin1@gmx.de

37 Anja Finck: Anja.Finck@medizin.uni-leipzig.de

38 Maria Arelin: Maria.Arelin@medizin.uni-leipzig.de

39 Carolin Baade-Büttner: Carolin.Baade@medizin.uni-leipzig.de

40 Tobias Bartolomaeus: Tobias.Bartolomaeus@medizin.uni-leipzig.de

41 Peter Bauer: Peter.Bauer@centogene.com

42 Astrid Bertsche: astrid.bertsche@medizin.uni-leipzig.de

43 Matthias K. Bernhard: Matthias.Bernhard@medizin.uni-leipzig.de

44 Saskia Biskup: Saskia.Biskup@humangenetik-tuebingen.de

45 Nataliya Di Donato: Nataliya.DiDonato@uniklinikum-dresden.de

46 Magdeldin Elgizouli: Magdeldin.Elgizouli@uk-essen.de

47 Roland Ewald: roland.ewald@limbus-medtec.com

48 Constanze Heine: Constanze.Heine@medizin.uni-leipzig.de

49 Yorck Hellenbroich: Yorck.Hellenbroich@uksh.de

50 Julia Hentschel: Julia.Hentschel@medizin.uni-leipzig.de

51 Sabine Hoffjan: Sabine.Hoffjan@rub.de

52 Susanne Horn: Susanne.Horn@medizin.uni-leipzig.de

53 Frauke Hornemann: Frauke.Hornemann@medizin.uni-leipzig.de

- 54 Dagmar Huhle: [dagmar.huhle@gmx.de](mailto:dagmar.huhle@gmx.de)
- 55 Susanne B. Kamphausen: [susanne.kamphausen@med.ovgu.de](mailto:susanne.kamphausen@med.ovgu.de)
- 56 Wieland Kiess: [Wieland.Kiess@medizin.uni-leipzig.de](mailto:Wieland.Kiess@medizin.uni-leipzig.de)
- 57 Ilona Krey: [Ilona.Krey@medizin.uni-leipzig.de](mailto:Ilona.Krey@medizin.uni-leipzig.de)
- 58 Alma Kuechler: [alma.kuechler@uni-due.de](mailto:alma.kuechler@uni-due.de)
- 59 Ben Liesfeld: [ben.liesfeld@limbus-medtec.com](mailto:ben.liesfeld@limbus-medtec.com)
- 60 Andreas Merckenschlager: [Andreas.Merckenschlager@medizin.uni-leipzig.de](mailto:Andreas.Merckenschlager@medizin.uni-leipzig.de)
- 61 Diana Mitter: [Diana.Mitter@medvz-leipzig.de](mailto:Diana.Mitter@medvz-leipzig.de)
- 62 Petra Muschke: [petra.muschke@med.ovgu.de](mailto:petra.muschke@med.ovgu.de)
- 63 Roland Pfäffle: [Roland.Pfaeffle@medizin.uni-leipzig.de](mailto:Roland.Pfaeffle@medizin.uni-leipzig.de)
- 64 Tilman Polster: [Tilman.Polster@mara.de](mailto:Tilman.Polster@mara.de)
- 65 Ina Schanze: [ina.schanze@med.ovgu.de](mailto:ina.schanze@med.ovgu.de)
- 66 Jan-Ulrich Schlump: [Jan-Ulrich.Schlump@eko.de](mailto:Jan-Ulrich.Schlump@eko.de)
- 67 Steffen Syrbe: [Steffen.Syrbe@med.uni-heidelberg.de](mailto:Steffen.Syrbe@med.uni-heidelberg.de)
- 68 Dagmar Wieczorek: [dagmar.wieczorek@uni-duesseldorf.de](mailto:dagmar.wieczorek@uni-duesseldorf.de)
- 69 Martin Zenker: [martin.zenker@med.ovgu.de](mailto:martin.zenker@med.ovgu.de)
- 70 Johannes R. Lemke: [Johannes.Lemke@medizin.uni-leipzig.de](mailto:Johannes.Lemke@medizin.uni-leipzig.de)
- 71 Diana Le Duc: [Gabriela-Diana.LeDuc@medizin.uni-leipzig.de](mailto:Gabriela-Diana.LeDuc@medizin.uni-leipzig.de)
- 72 Konrad Platzer: [Konrad.Platzer@medizin.uni-leipzig.de](mailto:Konrad.Platzer@medizin.uni-leipzig.de)
- 73 Rami Abou Jamra: [Rami.AbouJamra@medizin.uni-leipzig.de](mailto:Rami.AbouJamra@medizin.uni-leipzig.de)

74 **Abstract**

75 **Background**

76 Deciphering the monogenetic causes of neurodevelopmental disorders (NDD) is an important  
77 milestone to offer personalized care. But the plausibility of reported candidate genes in exome  
78 studies often remains unclear, which slows down progress in the field.

79

80 **Methods**

81 We performed exome sequencing (ES) in 198 cases of NDD. Cases that remained unresolved (n=135)  
82 were re-investigated in a research setting. We established a candidate scoring system (CaSc) based  
83 on 12 different parameters reflecting variant and gene attributes as well as current literature to rank  
84 and prioritize candidate genes.

85

86 **Results**

87 In this cohort, we identified 158 candidate variants in 148 genes with CaSc ranging from 2 to 11.7.  
88 Only considering the top 15% of candidates, 14 genes were already published or funneled into  
89 promising validation studies.

90

91 **Conclusions**

92 We promote that in an approach of case by case re-evaluation of primarily negative ES, systematic  
93 and standardized scoring of candidate genes can and should be applied. This simple framework  
94 enables better comparison, prioritization, and communication of candidate genes within the  
95 scientific community. This would represent an enormous benefit if applied to the tens of thousands  
96 of negative ES performed in routine diagnostics worldwide and speed up deciphering the  
97 monogenetic causes of NDD.

98 **Key words**

99 Exome sequencing, NDD, mental retardation, Candidate gene, Scoring, intellectual disability

100 **Background**

101

102 The entirety of rare diseases represents a substantial burden and affects millions of individuals  
103 worldwide<sup>1</sup>. A large part of these diseases have a genetic cause<sup>2</sup>, but many cases remain  
104 undiagnosed. A missing diagnosis may have a negative impact on the caring families, medical  
105 treatment, socio-economic expenses, and on prognosis<sup>3</sup>.

106

107 This is most obvious in the genetic etiologies of neurodevelopmental disorders (NDD). Exome  
108 sequencing (ES) has proven to be highly successful in identifying causes of NDD<sup>4, 5</sup>. Thus, large efforts  
109 have been undertaken in order to decipher the genetics of NDD<sup>6-12</sup>. The DDD study is the most  
110 prominent example<sup>12</sup>. It included 7580 trio ES cases with NDD and 14 genes were reported as  
111 statistically valid novel NDD genes. Major studies like this are of high importance and give  
112 unprecedented insights into the genetics of NDD. Considering the available supplemental tables with  
113 a high number of de novo candidate variants, we understand that many NDD genes did not reach the  
114 significance threshold after correcting for multiple testing. Thus, we see that a complementary  
115 approach that includes the specific characteristics of the variants and the genes as well as the clinical  
116 information of the patients may overcome the burden of statistical significance thresholds. This  
117 requires a detailed case by case evaluation as presented by other research approaches that have  
118 focused on smaller, often homogeneous cohorts<sup>13,14,15</sup>. However, in these studies the plausibility of  
119 many of the reported candidate genes remained unclear. The challenge of differentiating relevant  
120 genes from false positives is an issue in single cases or small cohorts. As such small cohorts are  
121 available at many institutions worldwide, genes cannot be statistically validated. On the other hand,  
122 such institutions collectively perform tens of thousands of exome sequencing in NDD cases, including  
123 the implementation of case-specific information. More than half of them remain negative in a  
124 diagnostic setting<sup>5</sup>, representing a large potential in the re-evaluation of such cases in a research  
125 setting.

126 The above mentioned aspects and our own experience motivated us to this study<sup>5, 14</sup>. We  
127 demonstrate that re-evaluation of negative ES in a research setting, including the specific  
128 characteristics of the candidate variants and genes as well as the clinical information, followed by  
129 standardized scoring of identified variants and genes is a powerful tool to speed up deciphering the  
130 genetics of NDD.

131 **Materials and Methods**

132

133 **Patients**

134 We considered all NDD cases that were introduced to us between January 2016 and December 2017.

135 We performed ES, when a genetic diagnosis could not be set based on routine methods such as

136 chromosome, array, or panel analysis. In total, 198 cases were sequenced. In 92 % (n=182) of the

137 cases, a trio setting were performed, while the remaining were solo (n=7), duo (n=4), or quattro

138 exome sequencing (n=5). In 61% (n=120), the index was male, and in 12% (n=24) of consanguineous

139 families. The range of age of the analyzed individuals was from the day of birth to 44 years; 9%

140 (n=17) were under one year old, 47% (n=94) were 1 to 5 years old, 41% (n=82) were 6 to 20 years old

141 and 3% (n=5) were older than 20 years. Epilepsy was reported in 53% (n=104) of the cases, 24%

142 (n=48) had dysmorphic features, 20% (n=40) had microcephaly, 20% (n=39) had muscular hypotonia,

143 12% (n=23) had short stature, 10% (n=19) had features of autism spectrum disorder, and 5% (n=9)

144 had macrocephaly (detailed clinical information in Case Overview in table S1). Human Phenotype

145 Ontology (HPO) terms were used to standardize the descriptions of the phenotypic information<sup>16</sup>.

146

147 **Exome sequencing and bioinformatic analyses**

148 ES was performed after an enrichment with Nextera All Human 37Mb or Agilent SureSelect All

149 Human Version 6 (60Mb) and sequenced on an Illumina platform (HiSeq2500 or NovaSeq6000) at

150 Centogene's laboratory in Rostock, Germany, or at CeGaT's laboratory in Tübingen, Germany.

151 Analysis of the raw data including variant calling and annotation was performed using the software

152 VARVIS (Limbus, Rostock).

153

154 **Variant evaluation**

155 First, ES data was evaluated in a setting of routine diagnostics, meaning that results of genes that

156 have been clearly associated with a specific phenotype were reported to the referring physicians.



157 This evaluation based on common standards of impact of the variant, prevalence in the general  
158 population, segregation in the family, and overlapping of patients symptoms with the described  
159 phenotype, and the variants were classified based on the ACMG recommendations<sup>17</sup>.

160 If in the first step no convincing variant was identified, we evaluated the exome sequencing in a  
161 second step in a research setting. We identified candidate variants based on their minor allele  
162 frequency in the general population (genome aggregation database)<sup>18</sup>, on their impact on the protein  
163 using Sequencing Ontology terms<sup>19</sup> and based on the segregation in the family (comparable to the  
164 suggested procedure by MacArthur and colleagues<sup>20</sup>).

165

#### 166 **Candidate score (CaSc)**

167 Due to the large number of candidate variants and in order to reduce arbitrariness in deciding which  
168 genes to follow on, to efficiently communicate with colleagues, and to focus resources on the most  
169 convincing candidates, we sought to prioritize in a top-down relevance list to compare plausible and  
170 highly convincing genes with less relevant genes<sup>20</sup>. For this purpose, we developed a candidate  
171 scoring (CaSc) system. At the same time, such scoring should not exclude genes that due to missing  
172 information show weak evidence of relevance, but that may get relevant in the future through  
173 accumulation of scientific knowledge.

174 CaSc comprises four major groups, containing 12 different parameters overall (Table 1, Figure 1, and  
175 Table S4 for detailed information). The maximal achievable CaSc is 15 points.

176 The parameters 1, 2, 3, 5, 6, 7, and 8 of the CaSc are objective. Five parameters (4, 9, 10, 11, and 12)  
177 have a subjective component (see also Table 1 and detailed information in Table S4). This partial  
178 subjectivity is due to differences between the scientific evaluators, including individual experience in  
179 identification and assessment of relevant literature or animal models or in understanding  
180 neurological networks. On the other hand, having several parameters makes error in evaluating one  
181 of these less relevant for the sum of the CaSc, thus attenuating the subjectivity of the score (see  
182 statistic evaluation of CaSc).

183 **Reproducibility of CaSc**

184 To evaluate the reproducibility of the CaSc, three different scientists scored the same 29 randomly  
185 selected candidate variants. The three scientists evaluated the subjective parameters 4, 9, 10, 11,  
186 and 12 of the CaSc (expression, neuronal function, gene family and interactions, animal model, and  
187 reported somewhere else as candidate for NDD, respectively). We performed a one-way ANOVA  
188 between the three evaluators to prove the interrater correlation. In order to exclude that an  
189 evaluator would, e.g., tend to score high genes that another scores low and vice versa, i.e. to support  
190 the specificity of the scoring, we also asked for specific scoring of each gene.

191 **Results**

192

193 **Diagnostic yield**

194 In 32% (n=63) of the cases we have identified variants that we found reliable enough to be reported  
195 to the referring physicians (Tables S1 and S2). Based on the ACMG-Guidelines<sup>17</sup> we classified 28% of  
196 them as pathogenic, 50% as likely pathogenic, and 22% as variant of unknown significance (VUS).  
197 These cases were excluded from re-evaluation in a research setting. Details are in Figure 2 and the  
198 Supplemental Tables S1 and S2.

199

200 **Candidate genes**

201 Re-evaluation of the unsolved 135 cases in a research setting revealed, in 79 cases, 158 potentially  
202 causative candidate variants in 148 candidate genes (two compound heterozygous variants count as  
203 one). CaSc varied over the 158 variants between 2.0 and 11.7 points (Figure 3). To demonstrate the  
204 utility of this score, we list below the candidates with CaSc  $\geq 9$  (top 15%); *TANC2*, *GLS*, *ASIC1A*,  
205 *KMT2E*, *ACTL6B*, *GRIN3B*, *SPEN*, *DNAH14*, *CUX1*, *PUM1*, *UNC13A*, *RASGRP1*, *GRIA4*, *SLC32A1*, *PUM2*,  
206 *TOB1*, *MAPK8IP3*, *NPTX1*, *ETV5*, *CACNB4*, *WDFY3* (for a detailed list of all candidates, see Table S2).  
207 Fourteen of these were published or funneled into subsequent validation studies<sup>21-29</sup> (*TANC2*,  
208 *KMT2E*, and *WDFY3* are under review, but still unpublished data). Of the 158 candidate variants,  
209 most were *de novo* (n=74, 47%, of these 71 are autosomal, 3 are X linked), followed by autosomal  
210 recessive (n=68, 43%, of these 41 are compound heterozygous, and 27 are homozygous, mostly  
211 (n=22) observed in consanguineous families), and inherited variants (n=15, 9%, are X linked and one  
212 is an autosomal, paternally inherited heterozygous variant) (Figure 2 and Tables S1 and S2).

213

214 **Reproducibility of the score**

215 To test the reproducibility of CaSc, three different users independently scored the subjective  
216 components of the same randomly selected 29 candidate variants. The CaSc of the 29 triple analyzed

217 variants fluctuates with a mean value of 0.4 points with a standard deviation of 0.19. The one-way  
218 ANOVA showed that there is no significant difference between the evaluators ( $p$  of 0.5163). Also a  
219 pair-wise comparison of the evaluators showed no significant difference (see Table S3). To support  
220 the specificity of the scoring we also asked whether there is a difference between the scores for each  
221 gene. This demonstrates that the scoring is specific for each gene ( $p < 0.0001$ ,  $F(28,56) = 49.71$ ).

222 **Discussion**

223

224 Institutions around the globe perform presumably tens of thousands of ES in cases of NDD on a  
225 yearly basis. These cases are evaluated in detail in a clinical diagnostic setting but over half of them  
226 remain negative<sup>5</sup>. The scientific content of these negative cases is often not fully exploited, as  
227 candidate variants and genes cannot be proven as valid on a statistical basis as demonstrated by  
228 major studies,<sup>6-12</sup> due to the data residing in different “silos”. Considering the above mentioned  
229 aspects, we see the need for a systematic and complimentary approach to major NDD studies. We  
230 recommend a detailed evaluation of all negative cases, considering functional aspects of the  
231 candidate genes, *in silico* evaluation of the variants, the literature and clinical presentation, followed  
232 by a systematic and standardized scoring of candidates to prioritize genes for validation studies.

233

234 In our relatively small cohort of 198 cases with neurodevelopmental disorders, we diagnosed 63  
235 cases due to variants in previously described NDD genes (detailed information in Figure 2). We  
236 evaluated the remaining 135 negative ES cases in a research setting. In 79 cases we identified 158  
237 candidate variants in 148 candidate genes. It was promptly clear that many of these genes would be  
238 false positive (e.g. among cases with more than one candidate (Figure 3)). For valid disease genes,  
239 ACMG standards and guidelines are used to standardize the evaluation of variants<sup>17</sup> and reduce  
240 errors. Applying feasible evaluation standards for candidate genes of NDD would ease the analysis of  
241 these variants and increase its usability for other scientists. Thus, to standardize prioritization of  
242 possible disease-causing variants, we established a candidate score (CaSc) system. This is a system of  
243 12 parameters that can be applied to any variant within a few minutes by exome evaluators. CaSc  
244 varied in our candidates between 2 and 11.7 points (maximum range 15 points). The candidates at  
245 the lower end of CaSc have naturally a higher probability of being false positive, but including these  
246 increases the sensitivity and represents a negative control as suggested before<sup>20</sup>. We compensated  
247 the consequently reduced specificity by a top-down approach.

248 Considering all 23 candidate variants (in 21 genes) with scores of 9.0 or more (equivalent to top 15%)  
249 revealed that at least 14 of them (*TANC2*, *GLS*, *KMT2E*, *ACTL6B*, *GRIN3B*, *SPEN*, *CUX1*, *PUM1*,  
250 *UNC13A*, *GRIA4*, *SLC32A1*, *PUM2*, *MAPK8IP3*, *WDFY3*) are already published or funneled into projects  
251 with several other patients and often with functional analyses<sup>21-29</sup> (as of 15<sup>th</sup> of February 2019, see  
252 also Figure 3) (*TANC2*, *KMT2E*, and *WDFY3* are under review, but still unpublished data). For the  
253 remaining seven genes *ASIC1*, *DNAH14*, *RASGRP1*, *TOB1*, *NPTX1*, *ETV5*, and *CACNB4* there is partly  
254 good supporting evidence in the literature or via GeneMatcher<sup>30</sup>, but further analyses are necessary.  
255 Such genes should be followed on in the next step. The yield of genes beyond the 15% threshold is  
256 currently smaller, partially since we decided to concentrate our limited resources on genes at the top  
257 of our ranking. However, there are still some interesting genes such as *MADD* (CaSc of 7.8, top-down  
258 position: 35, manuscript in preparation) as well as *EGR3* and *GTPBP2* (CaSc of 8.7 and 8.4,  
259 respectively, and several matches in GeneMatcher). This shows that although we expect more false  
260 positive in the remaining 85% of candidates, many of these are going to be validated. Thus, we have  
261 included detailed supplemental tables of all available genetic and clinical information on each of the  
262 candidates. This offers the scientific community the possibility to find further hits for their  
263 candidates, associated with information on the relevance to enhance plausibility.

264

265 The CaSc can be roughly divided into a gene-dependent component and a variant-dependent  
266 component. The latter is fully objective and can be automatized since it includes information that is  
267 often included in a standard annotation pipelines (impact on protein, *in silico* prediction and  
268 conservation, minor allele frequency, and zygosity). The gene-dependent component is partially  
269 subjective since it includes manual evaluation of the literature regarding protein function and  
270 interactions, animal models, tissue expression, as well as identifying further hits in the gene in other  
271 studies. We are aware that the subjectivity of this information can be reduced by detailed  
272 prescription of sources and information that are allowed to be used. However, we found that this  
273 either leads to loss of information or it makes scoring a tedious task thus reducing compliance and/or

274 efficacy of exome evaluators. In addition to the gene- and variant-components, pLI- and z-scores  
275 combine both components. Furthermore, there are considerations on the meta-level, which,  
276 although subjective, strengthen the CaSc, e.g. considering a mouse model improper if it obviously  
277 demonstrates a full loss of function (knock-out) while the identified variant is a missense and highly  
278 suggestive for a gain of function.

279

280 Due to our awareness of the partial subjectivity of the CaSc, we aimed at proving its reproducibility.  
281 Evaluating the same variant by different scientists did not lead to deviating scoring, thus proving  
282 reproducibility of the CaSc. Certainly, it is important that people are well instructed and trained. It is  
283 also still not proven that the reproducibility holds up when the CaSc is used at different centers. We  
284 are aware that CaSc does not have a clear cut-off and that a high score is not a guarantee for a gene  
285 valid gene. We are also aware that CaSc is only a snapshot of supporting evidence at the time of  
286 analysis. However, our experience with published genes and ongoing studies as well as the  
287 reproducibility of CaSc show that it is an enormously useful tool in order to prioritize genes and to  
288 compare and communicate the relevance of candidate genes within the scientific community.

289

290 In opposite to the large studies, our approach does not allow making general statements on the  
291 genetics of NDD. However, our approach evaluates all cases, case by case, including the full spectrum  
292 of available clinical and genetic information. Case by case analysis seems at the first glance as a  
293 tedious work that cannot be done for a large number of affected individuals. However, after clinical  
294 examinations, often including imaging, followed by plenty of documentation tasks, wet lab  
295 sequencing, and bioinformatic preparation, the evaluation in a research setting of a trio exome and  
296 describing and documenting candidate genes represents only a small additional task but enriches the  
297 outcome enormously. Our experience shows that a trained scientist can easily handle several  
298 hundred cases per year, and that CaSc is easy to learn and can practically be implemented in daily  
299 clinical and research routine. Thus, we consider this scientific effort as feasible and necessary.

300 Indeed, we consider it unjustifiable not to perform this last and rather small step after enormous  
301 efforts have been invested in each case.

302

303 As an outlook, large parts of CaSc can be automatized. However, at the time we see a big benefit in  
304 the manual evaluation of the literature. Future studies may compare the usability of the score in its  
305 current manual form and in an automatized form to see if there is a significant difference in  
306 performance. Also, such scoring systems can be expanded to other phenotypes, after proper  
307 modifications.



308 **Conclusions**

309 In conclusion, our experience shows that case-specific evaluation of exome sequencing data followed  
310 by standardized scoring of candidate genes is a powerful first step to identify novel NDD genes.  
311 Probably tens of thousands of trio exome sequencing of NDD would benefit from such a tool since it  
312 would ease comparisons and communications, help scientists to make the most use of their results  
313 and speed deciphering of NDD.

314 **Declarations**

315 **Ethics approval and consent to participate**

316 All analyses were performed in concordance to the provisions of the German Gene Diagnostic Act  
317 (*Gendiagnostikgesetz*) and the German Data Protection Act (*Bundesdatenschutzgesetz*). The project  
318 was approved by the ethic committee of the University of Leipzig, Germany (224/16-ek and 402/16-  
319 ek). Written informed consent of all examined individuals or their legal representatives was obtained  
320 prior to genetic testing and after advice and information about the risks and benefits of the study.  
321 This study does not involve animals.

322

323 **Consent for publication**

324 Our manuscript does not contain any individual person's data in any form (including any individual  
325 details, images or videos). As mentioned above, consent for publication has been obtained from  
326 every person, or in the case of children, their parent or legal guardian.

327

328 **Availability of data and material**

329 The datasets generated and analyzed during the current study are available from the corresponding  
330 author Rami Abou Jamra on reasonable request. All results during this study are included in this  
331 published article and its supplementary information files.

332

333 **Competing interests**

334 Ben Liesfeld and Roland Ewald work for Limbus and own shares. Saskia Biskup works for CeGat and  
335 owns shares. Peter Bauer works for Centogene. Dagmar Huhle works for Praxis für Humangenetik  
336 Leipzig and owns shares. All other authors declare that they have no competing interests.

337 **Funding**

338 This study was not supported by funding.

339

340 **Authors' contributions**

341 BB, SM, AF, CBB, CH, JH, SuH, DLD, KP and RAJ have analyzed the data. BB and RAJ have written the  
342 manuscript. BB, MZ, JRL, DLD, KP and RAJ have contributed to concept and design. TB, AB, MKB,  
343 NDD, ME, CH, YH, SaH, FH, DH, SBK, WK, IK, AK, AM, DM, PM, RP, TP, IS, JUS, SS, DW, and MZ have  
344 examined and counseled patients. BL, RE, SB, PP and JH have generated data.

345 All authors have approved the submitted version. All authors have agreed both to be personally  
346 accountable for the author's own contributions and to ensure that questions related to the accuracy  
347 or integrity of any part of the work, even ones in which the author was not personally involved, are  
348 appropriately investigated, resolved, and the resolution documented in the literature.

349

350 **Acknowledgments**

351 We thank all patients and their families who participated in this study.

352 **Web links and URLs**

353 Genome Aggregation Database (GnomAD), <https://gnomad.broadinstitute.org/>

354 GeneMatcher, <https://genematcher.org>

355 Online Mendelian Inheritance in Man (OMIM), <http://www.ncbi.nlm.nih.gov/Omim/>

356 Sequence Ontology, <http://www.sequenceontology.org/>

357 VARVIS (Limbus, Rostock), <https://www.limbus-medtec.com/>

358 Genotype-Tissue Expression Project, <https://gtexportal.org>

359 **References**

- 360 1. Baird, P.A., Anderson, T.W., Newcombe, H.B. and Lowry, R.B. (1988). Genetic disorders in  
361 children and young adults. A population study. *American journal of human genetics* *42*, 677–  
362 693.
- 363 2. Boycott, K.M., Vanstone, M.R., Bulman, D.E. and MacKenzie, A.E. (2013). Rare-disease genetics  
364 in the era of next-generation sequencing. Discovery to translation. *Nature reviews. Genetics* *14*,  
365 681–691.
- 366 3. Ropers, H.H. (2010). Genetics of early onset cognitive impairment. *Annual review of genomics*  
367 *and human genetics* *11*, 161–187.
- 368 4. Bamshad, M.J., Ng, S.B., Bigam, A.W., Tabor, H.K., Emond, M.J., Nickerson, D.A. and Shendure,  
369 J. (2011). Exome sequencing as a tool for Mendelian disease gene discovery. *Nature reviews.*  
370 *Genetics* *12*, 745–755.
- 371 5. Trujillano, D., Bertoli-Avella, A.M., Kumar Kandaswamy, K., Weiss, M.E., Köster, J., Marais, A.,  
372 Paknia, O., Schröder, R., Garcia-Aznar, J.M. and Werber, M., et al. (2017). Clinical exome  
373 sequencing. Results from 2819 samples reflecting 1000 families. *European journal of human*  
374 *genetics : EJHG* *25*, 176–182.
- 375 6. McRae, J. F., Clayton, S., Fitzgerald, T.W., Kaplanis, J., Prigmore, E., Rajan, D., Sifrim A., Aitken, S.,  
376 Akawi, N., Alvi, M., et al. (2017). Prevalence and architecture of de novo mutations in  
377 developmental disorders. *Nature* *542*, 433–438.
- 378 7. Lelieveld, S.H., Reijnders, M.R.F., Pfundt, R., Yntema, H.G., Kamsteeg, E.-J., Vries, P. de, Vries,  
379 B.B.A. de, Willemsen, M.H., Kleefstra, T. and Löhner, K., et al. (2016). Meta-analysis of 2,104  
380 trios provides support for 10 new genes for intellectual disability. *Nature neuroscience* *19*,  
381 1194–1196.
- 382 8. C Yuen, R.K., Merico, D., Bookman, M., L Howe, J., Thiruvahindrapuram, B., Patel, R.V., Whitney,  
383 J., Deflaux, N., Bingham, J. and Wang, Z., et al. (2017). Whole genome sequencing resource  
384 identifies 18 new candidate genes for autism spectrum disorder. *Nature neuroscience* *20*, 602–  
385 611.
- 386 9. Wang, T., Guo, H., Xiong, B., Stessman, H.A.F., Wu, H., Coe, B.P., Turner, T.N., Liu, Y., Zhao, W.  
387 and Hoekzema, K., et al. De novo genic mutations among a Chinese autism spectrum disorder  
388 cohort. *Nature communications*. 2016 7, 13316.
- 389 10. Heyne, H.O., Singh, T., Stamberger, H., Abou Jamra, R., Caglayan, H., Craiu, D., Jonghe, P. de,  
390 Guerrini, R., Helbig, K.L. and Koeleman, B.P.C., et al. De novo variants in neurodevelopmental  
391 disorders with epilepsy. *Nature genetics*. 2018 *50*, 1048–1053.
- 392 11. Martin, H.C., Jones, W.D., McIntyre, R., Sanchez-Andrade, G., Sanderson, M., Stephenson, J.D.,  
393 Jones, C.P., Handsaker, J., Gallone, G. and Bruntraeger, M., et al. (2018). Quantifying the  
394 contribution of recessive coding variation to developmental disorders. *Science (New York, N.Y.)*.  
395 12. The Deciphering Developmental Disorders Study (2015). Large-scale discovery of novel genetic  
396 causes of developmental disorders. *Nature* *519*, 223–228.
- 397 13. Rauch, A., Wieczorek, D., Graf, E., Wieland, T., Ende, S., Schwarzmayr, T., Albrecht, B.,  
398 Bartholdi, D., Beygo, J. and Di Donato, N., et al. (2012). Range of genetic mutations associated  
399 with severe non-syndromic sporadic intellectual disability. An exome sequencing study. *The*  
400 *Lancet* *380*, 1674–1682.
- 401 14. Reuter, M.S., Tawamie, H., Buchert, R., Hosny Gebriel, O., Froukh, T., Thiel, C., Uebe, S., Ekici, A.B.,  
402 Krumbiegel, M. and Zweier, C., et al. (2017). Diagnostic Yield and Novel Candidate Genes by

- 403 Exome Sequencing in 152 Consanguineous Families With Neurodevelopmental Disorders. *JAMA*  
404 *psychiatry* 74, 293–299.
- 405 15. Hu, H., Haas, S.A., Chelly, J., van Esch, H., Raynaud, M., Brouwer, A.P.M. de, Weinert, S., Froyen,  
406 G., Frints, S.G.M. and Laumonnier, F., et al. (2016). X-exome sequencing of 405 unresolved  
407 families identifies seven novel intellectual disability genes. *Molecular psychiatry* 21, 133–148.
- 408 16. Robinson, P.N., Köhler, S., Bauer, S., Seelow, D., Horn, D. and Mundlos, S. (2008). The Human  
409 Phenotype Ontology. A tool for annotating and analyzing human hereditary disease. *American*  
410 *journal of human genetics* 83, 610–615.
- 411 17. Richards, S., Aziz, N., Bale, S., Bick, D., Das, S., Gastier-Foster, J., Grody, W.W., Hegde, M., Lyon,  
412 E. and Spector, E., et al. (2015). Standards and guidelines for the interpretation of sequence  
413 variants. A joint consensus recommendation of the American College of Medical Genetics and  
414 Genomics and the Association for Molecular Pathology. *Genetics in medicine : official journal of*  
415 *the American College of Medical Genetics* 17, 405–424.
- 416 18. Lek, M., Karczewski, K.J., Minikel, E.V., Samocha, K.E., Banks, E., Fennell, T., O'Donnell-Luria,  
417 A.H., Ware, J.S., Hill, A.J. and Cummings, B.B., et al. (2016). Analysis of protein-coding genetic  
418 variation in 60,706 humans. *Nature* 536, 285–291.
- 419 19. Eilbeck, K., Lewis, S.E., Mungall, C.J., Yandell, M., Stein, L., Durbin, R. and Ashburner, M. The  
420 Sequence Ontology. A tool for the unification of genome annotations. *Genome biology*. 2005 6,  
421 R44.
- 422 20. MacArthur, D.G., Manolio, T.A., Dimmock, D.P., Rehm, H.L., Shendure, J., Abecasis, G.R., Adams,  
423 D.R., Altman, R.B., Antonarakis, S.E. and Ashley, E.A., et al. Guidelines for investigating causality  
424 of sequence variants in human disease. *Nature*. 2014 508, 469–476.
- 425 21. Platzer, K., Cogné, B., Hague, J., Marcelis, C.L., Mitter, D., Oberndorff, K., Park, S.-M., van Ploos  
426 Amstel, H.K., Simonic, I. and van der Smagt, J.J., et al. (2018). Haploinsufficiency of CUX1 Causes  
427 Nonsyndromic Global Developmental Delay With Possible Catch-up Development. *Annals of*  
428 *neurology* 84, 200–207.
- 429 22. Platzer, K., Sticht, H., Edwards, S.L., Allen, W., Angione, K.M., Bonati, M.T., Brasington, C., Cho,  
430 M.T., Demmer, L.A. and Falik-Zaccai, T., et al. De Novo Variants in MAPK8IP3 Cause Intellectual  
431 Disability with Variable Brain Anomalies. *American journal of human genetics*. 2019.
- 432 23. Martin, S., Chamberlin, A., Shinde, D.N., Hempel, M., Strom, T.M., Schreiber, A., Johannsen, J.,  
433 Ousager, L.B., Larsen, M.J. and Hansen, L.K., et al. (2017). De Novo Variants in GRIA4 Lead to  
434 Intellectual Disability with or without Seizures and Gait Abnormalities. *American journal of*  
435 *human genetics* 101, 1013–1020.
- 436 24. Gennarino, V.A., Palmer, E.E., McDonell, L.M., Wang, L., Adamski, C.J., Koire, A., See, L., Chen, C.-  
437 A., Schaaf, C.P. and Rosenfeld, J.A., et al. A Mild PUM1 Mutation Is Associated with Adult-Onset  
438 Ataxia, whereas Haploinsufficiency Causes Developmental Delay and Seizures. *Cell*. 2018 172,  
439 924-936.e11.
- 440 25. Rumping, L., Büttner, B., Maier, O., Rehmann, H., Lequin, M., Schlump, J.-U., Schmitt, B.,  
441 Schiebergen-Bronkhorst, B., Prinsen, H.C.M.T. and Losa, M., et al. Identification of a Loss-of-  
442 Function Mutation in the Context of Glutaminase Deficiency and Neonatal Epileptic  
443 Encephalopathy. *JAMA neurology*. 2018.
- 444 26. Hui Guo, Elisa Bettella, Madelyn A. Gillentine et al. Disruptive mutations in TANC2 define a new  
445 neurodevelopmental syndrome associated with psychiatric disorders. *Nature Communication*,  
446 positively revised.
- 447 27. Anne H O'Donnell-Luria, Lynn S Pais, Víctor Faundes et al. Heterozygous variants in KMTE cause  
448 a spectrum of neurodevelopmental disorders and epilepsy. *AJHG*, positively revised.

- 449 28. Diana Le Duc, Cecilia Giulivi, Susan M. Hiatt et al. Pathogenic WDFY3 variants cause  
450 neurodevelopmental disorders and opposing effects on brain size. *Brain*, positively revised.
- 451 29. Fichera, M., Failla, P., Saccuzzo, L., Miceli, M., Salvo, E., Castiglia, L., Galesi, O., Grillo, L., Calì, F.  
452 and Greco, D., et al. Mutations in ACTL6B, coding for a subunit of the neuron-specific chromatin  
453 remodeling complex nBAF, cause early onset severe developmental and epileptic  
454 encephalopathy with brain hypomyelination and cerebellar atrophy. *Human genetics*. 2019 *138*,  
455 187–198.
- 456 30. Sobreira, N., Schiettecatte, F., Valle, D. and Hamosh, A. GeneMatcher. A matching tool for  
457 connecting investigators with an interest in the same gene. *Human mutation*. 2015 *36*, 928–930.

458 **Figure legends**

459

460 **Figure 1: Components and structure of CaSc**

461 CaSc comprises four major groups (in blue, red, orange and yellow color shades) containing 12  
462 different parameters; the maximum score of each parameter varies between 1 and 3 points. The  
463 total of the points results in the CaSc (see Table 1 and Table S4 for details on the parameters and  
464 how these are evaluated)

465

466 **Figure 2: Design and yield of the NDD cohort**

467 We performed exome sequencing of 198 NDD cases in solo, duo, trio and quattro designs (left,  
468 different orange color shades). The diagnostic yield (middle panel) varied between cases that were  
469 preceded by a panel diagnostic and that were analyzed initially in an exome setting. The right panel  
470 shows the zygosity of the diagnosed cases in the red circle and in the blue circle the zygosity of the  
471 candidate genes.

472

473 **Figure 3: Overview and top 15% of CaSc**

474 The maximal achievable CaSc is 15. In the upper panel we show a distribution over the 158 variants  
475 between 2.0 and 11.7 points. Different green color shades show how many candidate genes were  
476 identified in one case. The top 15% of the CaSc scored candidate genes ( $\text{CaSc} \geq 9$ ), equivalent to 23  
477 gene variants (and 21 genes since *GLS* and *SPEN* were hit twice). We divided these candidate genes in  
478 3 groups; published or accepted for publication, in preparation for publication, and not yet  
479 investigated, i.e. searching for cooperation partners.

480



| <b>Table 1: Candidate Score (CaSc)</b> |                                                            |                                                                                                                                                                        |         |
|----------------------------------------|------------------------------------------------------------|------------------------------------------------------------------------------------------------------------------------------------------------------------------------|---------|
| <b>Inheritance</b>                     |                                                            |                                                                                                                                                                        | points  |
| 1                                      | zygosity/family history/segregation                        | <i>de novo</i>                                                                                                                                                         | 2       |
|                                        |                                                            | homo or comphet with $\geq 2$ affected children                                                                                                                        | 3       |
|                                        |                                                            | homo                                                                                                                                                                   | 2       |
|                                        |                                                            | comphet                                                                                                                                                                | 1       |
|                                        |                                                            | X linked and a boy                                                                                                                                                     | 1       |
|                                        |                                                            | X linked and at least a second affected maternal male relative                                                                                                         | 2       |
|                                        |                                                            | other                                                                                                                                                                  | 0       |
| <b>Gene attributes<sup>18</sup></b>    |                                                            |                                                                                                                                                                        |         |
| 2                                      | pLI-score <sup>a</sup>                                     | <0.9                                                                                                                                                                   | 0       |
|                                        |                                                            | $\geq 0.9$                                                                                                                                                             | 1       |
| 3                                      | missense z-score <sup>b</sup>                              | <0                                                                                                                                                                     | 0       |
|                                        |                                                            | 0-3.08                                                                                                                                                                 | 0.5     |
|                                        |                                                            | $\geq 3.09$                                                                                                                                                            | 1       |
| 4                                      | expression <sup>c</sup>                                    | not in CNS                                                                                                                                                             | 0       |
|                                        |                                                            | low in CNS, and more in (some) other tissues                                                                                                                           | 0.4     |
|                                        |                                                            | expressed in CNS and is comparable to (some) other tissues                                                                                                             | 0.7     |
|                                        |                                                            | most or exclusively in CNS                                                                                                                                             | 1       |
| <b>Variant attributes</b>              |                                                            |                                                                                                                                                                        |         |
| 5                                      | Assumed impact on protein <sup>d</sup>                     | moderate                                                                                                                                                               | 0       |
|                                        |                                                            | high and heterozygous                                                                                                                                                  | 2       |
|                                        |                                                            | high and bi-allelic                                                                                                                                                    | 3       |
|                                        |                                                            | comphet = one moderate and one high                                                                                                                                    | 1       |
|                                        |                                                            | other                                                                                                                                                                  | 0       |
| 6                                      | <i>in silico</i> parameters                                | missense <sup>e</sup>                                                                                                                                                  | average |
|                                        |                                                            | LoF                                                                                                                                                                    | 1       |
|                                        |                                                            | splicing affected in one program <sup>f</sup>                                                                                                                          | 0.5     |
|                                        |                                                            | splicing affected in two or more programs <sup>f</sup>                                                                                                                 | 1       |
|                                        |                                                            | no available <i>in silico</i> values                                                                                                                                   | 0.5     |
| 7                                      | conservation                                               | LoF                                                                                                                                                                    | 1       |
|                                        |                                                            | percentile/ranking of the values of all possible variants <sup>g</sup>                                                                                                 | 0-1     |
| 8                                      | frequency <sup>h</sup>                                     | <i>de novo</i> or inherited in an AD pattern MAF of 0 or a maximum of one allele in all available databases in a disorder with no or extremely low reproduction chance | 1       |
|                                        |                                                            | <i>de novo</i> or inherited in an AD pattern in a disorder with a chance for reproduction; maximal allele number of 5 (MAF $\approx 0.00002$ ) in GnomAD               | 0.5     |
|                                        |                                                            | autosomal recessive inheritance; maximal MAF of 0.0005 in GnomAD <sup>i</sup>                                                                                          | 0.5     |
|                                        |                                                            | autosomal recessive inheritance; MAF of maximal 0.00005 <sup>i</sup>                                                                                                   | 1       |
|                                        |                                                            | X linked and discrepancy of MAF in GnomAD between males and females in a disorder with no chance for reproduction <sup>i</sup>                                         | 2       |
|                                        |                                                            | other                                                                                                                                                                  | 0       |
| <b>Literature research</b>             |                                                            |                                                                                                                                                                        |         |
| 9                                      | neuronal function                                          | no hints to be involved in neuronal function                                                                                                                           | 0       |
|                                        |                                                            | hints to be involved in neuronal function                                                                                                                              | 0.5     |
|                                        |                                                            | hints to be involved in neuronal function regarding signaling/development                                                                                              | 1       |
| 10                                     | gene family/neurological interactions <sup>k</sup>         | yes                                                                                                                                                                    | 1       |
|                                        |                                                            | no                                                                                                                                                                     | 0       |
| 11                                     | animal models with neuronal-phenotype                      | no neurological or behavioral phenotype                                                                                                                                | 0       |
|                                        |                                                            | neurological or behavioral phenotype                                                                                                                                   | 0.5     |
|                                        |                                                            | comparable neurological phenotypes                                                                                                                                     | 1       |
| 12                                     | reported somewhere else as candidate for NDD? <sup>l</sup> | per hit, <i>maximal score: 2</i>                                                                                                                                       | 0.33    |

### Legend of Table 1

To estimate the relevance of candidate genes and prioritize for further analyses, we established a candidate scoring system using four groups divided into 12 parameters. The CaSc can reach a maximum value of 15 points.

### Abbreviations

CaSc: candidate score; pLI: the probability of being loss-of-function intolerant; homo: homozygous ; comphet: compound heterozygous; CNS: central nervous system; LoF: loss of function; AD: autosomal dominant; MAF: minor allele frequency; NDD: neurodevelopmental disorder

### Footnotes

<sup>a</sup>If the variant is heterozygous and possibly truncating. pLI = the probability of being loss-of-function intolerant

<sup>b</sup>If the variant is heterozygous and missense,

<sup>c</sup>We have used for the analyses described in this manuscript the Genotype-Tissue Expression (GTEx) Project. GTEx Portal: <https://gtexportal.org>

<sup>d</sup>Based on Sequence Ontology (SO) terms: <http://www.sequenceontology.org/> (High: SO-ID: 1000182, 0001624, 0001572, 0001909, 0001910, 0001589, 0001908, 0001906, 0002007, 1000005, 0001587, 0001578, 0002012, 0001574, 0001575, 0001619; Moderate: SO-ID: 0001583, 0001821, 0001824, 0001822, 0001826, 0002013, 0001819, 0001630, Low: SO-ID: 0001567, 0001582, 0001819, 0001969, 0001792, 0001970, 0001983, 0002092, 0002089, 0002091, 0002090); details can be obtained on the website of Sequenceontology. Basically, however, variants leading to truncation would be high while variants that may lead to changes in protein sequence as well as splice variants that are not at the consensus splice site are moderate.

<sup>e</sup>0 to 1 percentile (ranking) of the values of available *in silico* programs, we used rankings of Sift, MutationTaster, and Mutation Assessor

<sup>f</sup>We have used SpliceSiteFinder-like, MaxEntScan, NNSPLICE, GeneSplicer, and Human Splicing Finder

<sup>g</sup>As for the *in silico* programs, we have used the percentiles (ranking numbers). We used GERP++RS for the estimation of conservation and estimated this based on other parameters if this value was not available

<sup>h</sup>We have used the GnomAD (<https://gnomad.broadinstitute.org/>) as we all our internal database of about 3000 probes

<sup>i</sup>For compound heterozygous variants take average of MAF of both variants

<sup>j</sup>Maximum of one male allele in GnomAD and minimal of 3 or more female alleles; X linked variants can also be scored as autosomal variants, e.g. if *de novo* or inherited.

<sup>k</sup>Are there related genes or interaction partners with neurological phenotype?

<sup>l</sup>Candidate reported in other studies, internal candidate genes tables, HGMD, ClinVar, literature, occasionally GeneMatcher, etc. It is clear that this aspect cannot be conclusive.

482 **Supplemental Data**

483 Supplemental Data includes four tables

484 **1. Supplemental Table 1 gives a good overview of the examined cases:** we list all examined persons  
485 sequentially from 1 to 198. We include general and clinical information on each individual, if the case  
486 is clinically solved (including gene), if we have identified a candidate gene or several candidate genes,  
487 or if the case remained fully negative. We contribute also information on the testing that has been  
488 performed (panel, exome, trio, single, etc.). We offer the table as pdf and as Excel files. The latter is  
489 easier to navigate in.

490 **2. Supplemental Table 2 gives a detailed description of identified genes and variants:** we list all  
491 genes in which we have identified variants. This includes candidate genes and also well-established  
492 NDD genes. We also list, to be complete, all fully negative cases. We add all available information on  
493 the clinical aspects, age, sex, family history, as well as all available information on the variant, the  
494 gene, the scoring and the rationale for our decision. We recommend using the Excel file in order to  
495 navigate in this table.

496 **3. Supplemental Table 3 shows how different users score the same variant and gene:** If you are  
497 interested to know how people differ in scoring, check this table. Otherwise, it does not include  
498 much information.

499 **4. Supplemental Table 4 describes in details the scoring system:** If you want to implement scoring at  
500 your lab, you need this table in order to see our elaboration on how and when to score variants and  
501 genes.

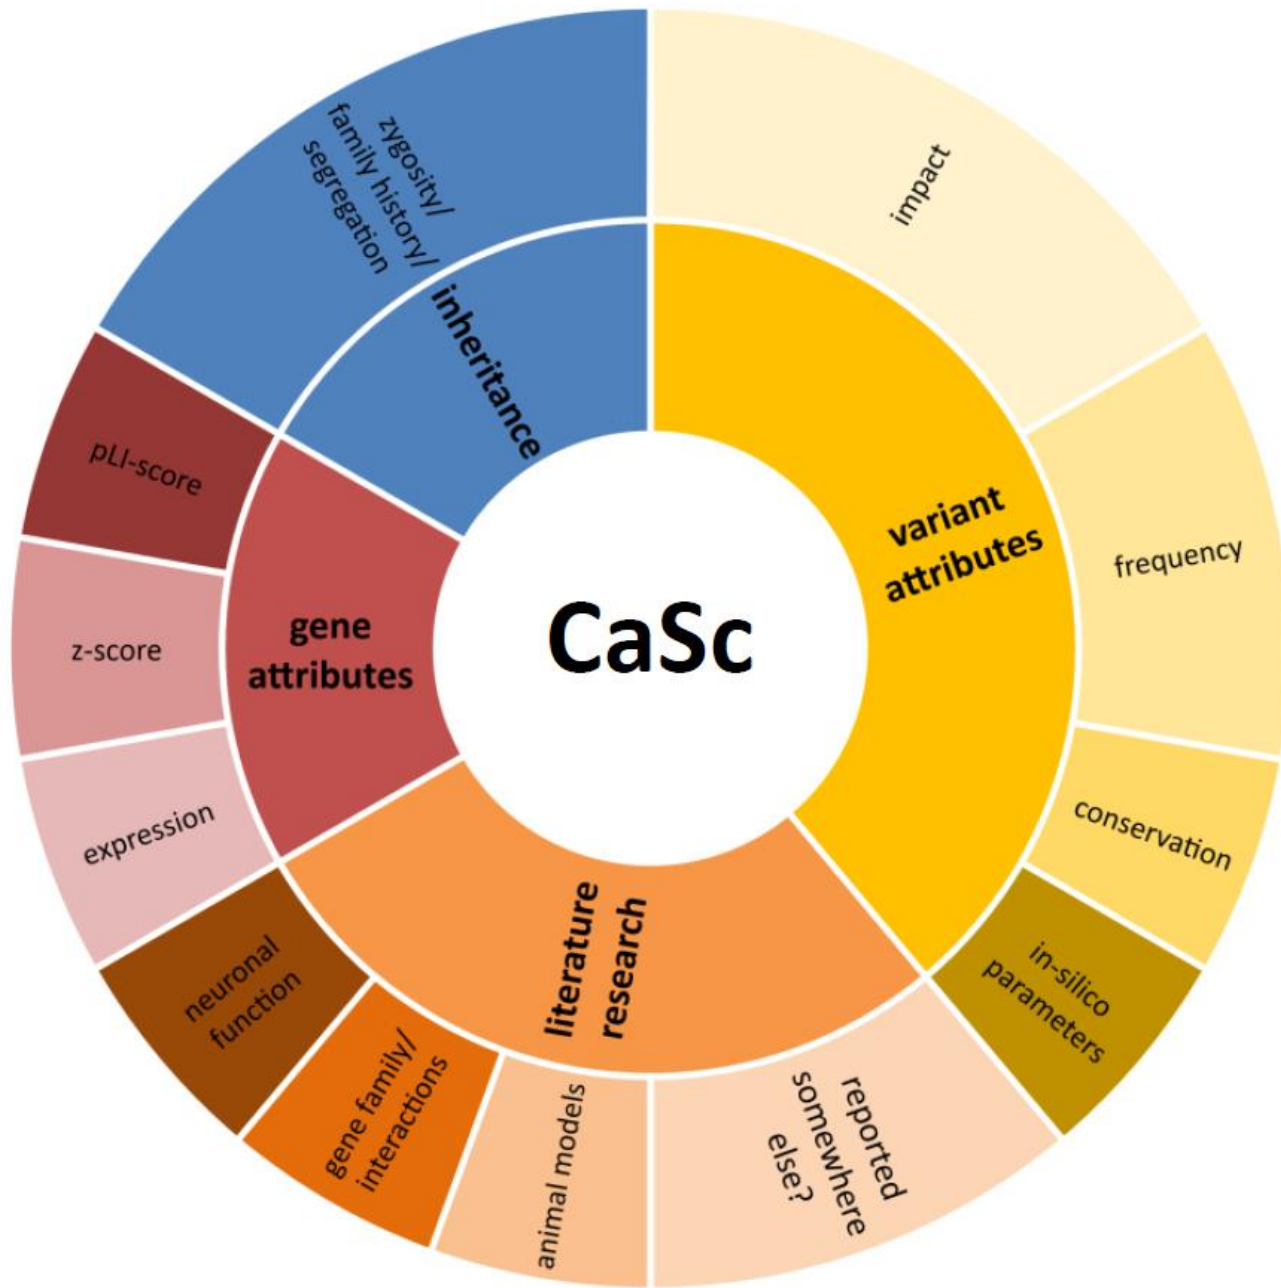

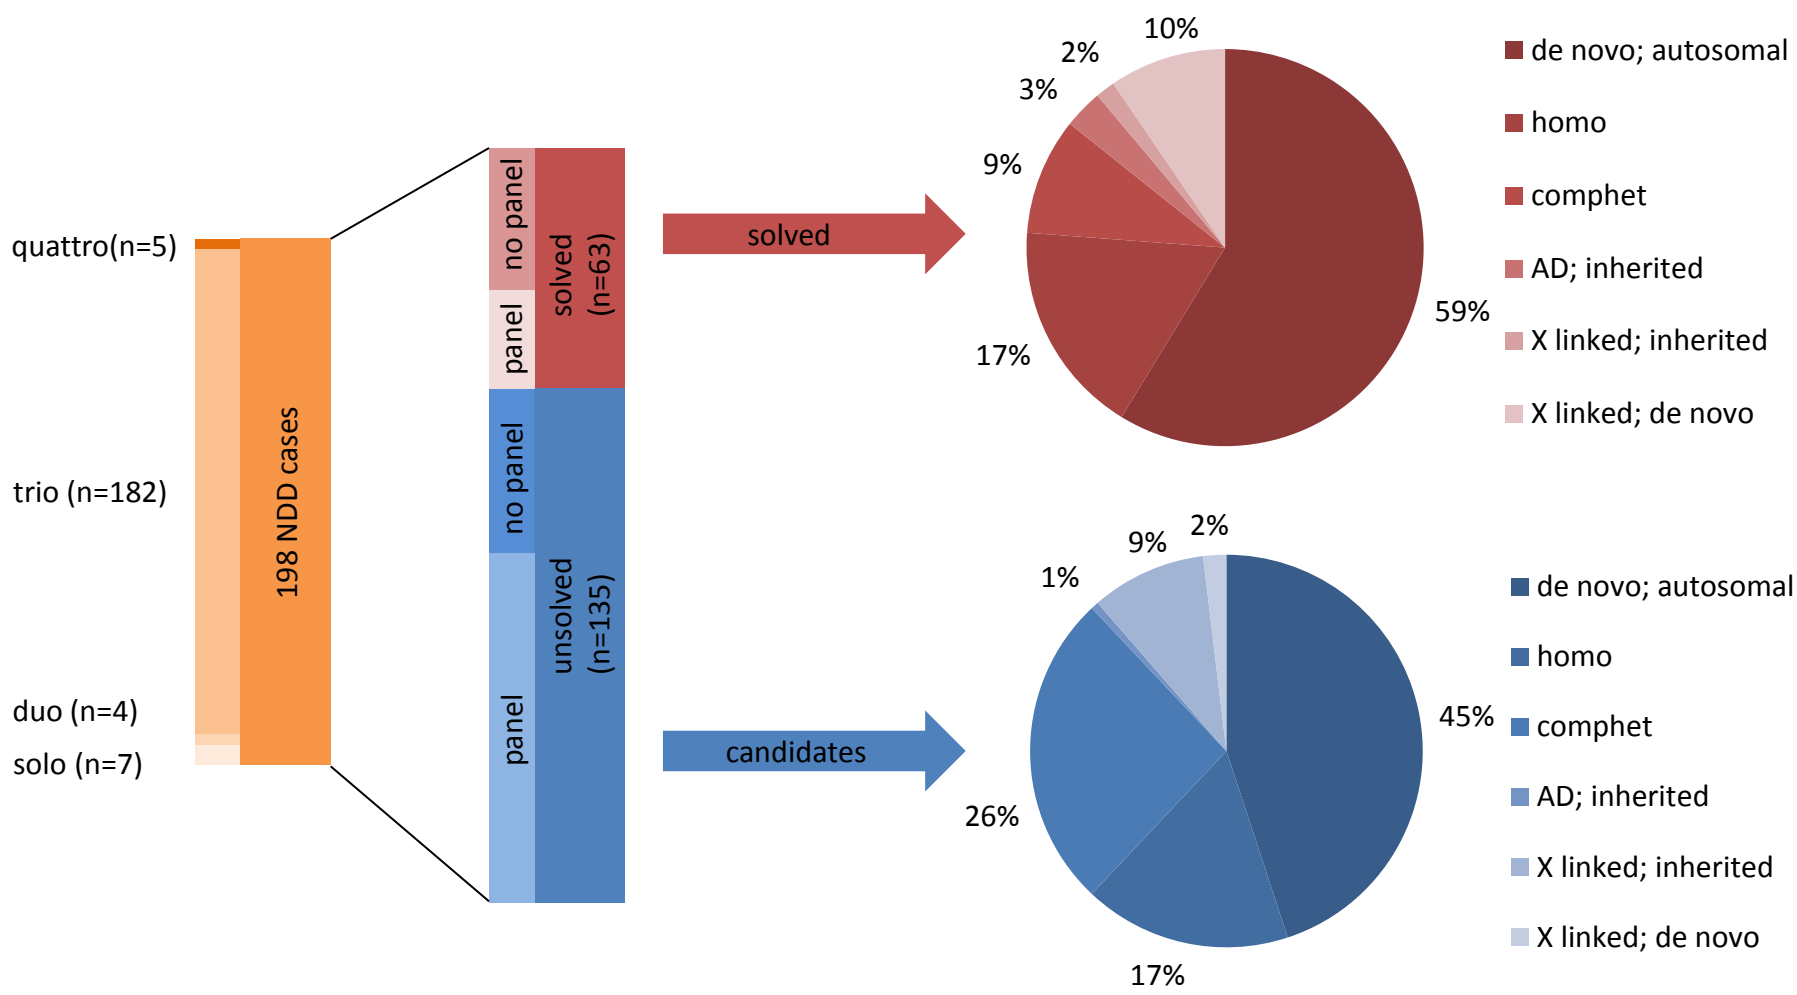

CaSc

15  
14  
13  
12  
11  
10  
9  
8  
7  
6  
5  
4  
3  
2  
1  
0

- Variant in an index with one candidate variant
- Variant in an index with two candidate variants
- Variant in an index with three or more candidate variants

158 candidate variants

**Top 15 % candidate genes**

| Gene | TANC2 | GLS  | ASIC1A | KMT2E | ACTL6B | GRIN3B | SPEN | DNAH14 | CUX1 | PUM1 | UNC13A | RASGRP1 | GRIA4 | SLC32A1 | PUM2 | TOB1 | MAPK8IP3 | NPTX1 | ETV5 | CACNB4 | WDFY3 |
|------|-------|------|--------|-------|--------|--------|------|--------|------|------|--------|---------|-------|---------|------|------|----------|-------|------|--------|-------|
| CaSc | 11.7  | 11.4 | 10.9   | 10.7  | 10.0   | 9.9    | 9.8  | 9.7    | 9.7  | 9.6  | 9.5    | 9.3     | 9.3   | 9.3     | 9.7  | 9.2  | 9.1      | 9.1   | 9.0  | 9.0    | 9.0   |

- published or accepted
- preparation for publication
- no ongoing analysis
